# Supplementary material for: Meta-Analysis of Common and Differential Transcriptomic Responses to Biotic and Abiotic Stresses in Arabidopsis thaliana
Source: MDPI journal article supplement (doi:10.3390/plants11040502), 2022-02-12
Supplement: s1 [file s1]

**Table S1.** List of the identified DEGs by meta- analysis.

| Stress | ID        | FC       | p-value  |    |
|--------|-----------|----------|----------|----|
| Biotic | AT2G44890 | 3.959559 | 0.000104 | Up |
| Biotic | AT1G09935 | 3.919835 | 0.000715 | Up |
| Biotic | AT4G34470 | 3.562859 | 0.007997 | Up |
| Biotic | AT5G37640 | 3.203562 | 0.006749 | Up |
| Biotic | AT3G14450 | 2.99951  | 0.001327 | Up |
| Biotic | AT2G30770 | 2.918921 | 0.000225 | Up |
| Biotic | AT3G12230 | 2.912123 | 0.000268 | Up |
| Biotic | AT1G64160 | 2.88458  | 0.003007 | Up |
| Biotic | AT1G33950 | 2.872597 | 0.002679 | Up |
| Biotic | AT5G56510 | 2.857949 | 0.007553 | Up |
| Biotic | AT5G45090 | 2.825806 | 0.000257 | Up |
| Biotic | AT5G36970 | 2.813229 | 8.13E-05 | Up |
| Biotic | AT3G03670 | 2.81107  | 0.00051  | Up |
| Biotic | AT5G06740 | 2.800048 | 0.000325 | Up |
| Biotic | AT4G11070 | 2.763891 | 0.003922 | Up |
| Biotic | AT2G24285 | 2.761538 | 0.001242 | Up |
| Biotic | AT5G39120 | 2.650048 | 0.008231 | Up |
| Biotic | AT5G22560 | 2.647134 | 0.007283 | Up |
| Biotic | AT2G31335 | 2.63938  | 0.000902 | Up |
| Biotic | AT2G21900 | 2.630096 | 0.008572 | Up |
| Biotic | AT1G06135 | 2.626024 | 8.34E-06 | Up |
| Biotic | AT3G13610 | 2.622067 | 2.04E-05 | Up |
| Biotic | AT1G05880 | 2.620229 | 0.00188  | Up |
| Biotic | AT5G25260 | 2.616393 | 0.003521 | Up |
| Biotic | AT5G46960 | 2.584948 | 0.00011  | Up |
| Biotic | AT2G29470 | 2.571698 | 0.000553 | Up |
| Biotic | AT5G40990 | 2.566352 | 9.75E-05 | Up |
| Biotic | AT4G19925 | 2.531731 | 0.006113 | Up |
| Biotic | AT2G45760 | 2.528714 | 0.002692 | Up |
| Biotic | AT1G75830 | 2.507154 | 3.14E-05 | Up |
| Biotic | AT3G25490 | 2.505425 | 0.007984 | Up |
| Biotic | AT2G29150 | 2.486676 | 0.003318 | Up |
| Biotic | AT5G64790 | 2.46628  | 0.006858 | Up |
| Biotic | AT3G46080 | 2.460804 | 0.006172 | Up |
| Biotic | AT3G21520 | 2.45262  | 7.09E-05 | Up |
| Biotic | AT5G23160 | 2.450968 | 0.000222 | Up |
| Biotic | AT1G15520 | 2.448128 | 1.8E-05  | Up |
| Biotic | AT4G11655 | 2.445632 | 0.00074  | Up |
| Biotic | AT5G38344 | 2.424099 | 0.000501 | Up |
| Biotic | AT1G71390 | 2.419528 | 8.03E-05 | Up |
| Biotic | AT1G19250 | 2.414245 | 5.03E-05 | Up |
| Biotic | AT5G19880 | 2.398417 | 0.000928 | Up |
| Biotic | AT1G13310 | 2.3956   | 0.004868 | Up |
| Biotic | AT2G35965 | 2.394258 | 0.001587 | Up |

---

|        |           |          |          |    |
|--------|-----------|----------|----------|----|
| Biotic | AT2G23830 | 2.391475 | 0.000303 | Up |
| Biotic | AT1G66600 | 2.39027  | 1.34E-05 | Up |
| Biotic | AT1G76470 | 2.349222 | 0.000513 | Up |
| Biotic | AT1G44130 | 2.344455 | 5.32E-05 | Up |
| Biotic | AT1G33960 | 2.316374 | 0.007516 | Up |
| Biotic | AT1G53620 | 2.316024 | 0.002174 | Up |
| Biotic | AT1G13340 | 2.305093 | 0.000148 | Up |
| Biotic | AT1G02580 | 2.299597 | 0.000929 | Up |
| Biotic | AT2G43570 | 2.279709 | 3.9E-05  | Up |
| Biotic | AT1G32350 | 2.264254 | 0.000499 | Up |
| Biotic | AT1G57630 | 2.252161 | 2.87E-05 | Up |
| Biotic | AT1G26410 | 2.244849 | 3.8E-07  | Up |
| Biotic | AT4G37710 | 2.226852 | 0.000141 | Up |
| Biotic | AT5G11210 | 2.22462  | 5.96E-06 | Up |
| Biotic | AT5G13320 | 2.21927  | 0.004205 | Up |
| Biotic | AT5G38900 | 2.217096 | 1.61E-05 | Up |
| Biotic | AT3G13433 | 2.196928 | 0.000385 | Up |
| Biotic | AT5G24540 | 2.186102 | 0.000154 | Up |
| Biotic | AT1G43910 | 2.176123 | 3.16E-05 | Up |
| Biotic | AT4G21840 | 2.170849 | 1.34E-05 | Up |
| Biotic | AT4G33020 | 2.166246 | 0.001905 | Up |
| Biotic | AT1G66700 | 2.162867 | 6.47E-06 | Up |
| Biotic | AT2G29350 | 2.154972 | 1.26E-05 | Up |
| Biotic | AT5G38350 | 2.153733 | 0.000596 | Up |
| Biotic | AT4G19970 | 2.150172 | 5.31E-05 | Up |
| Biotic | AT3G11340 | 2.129298 | 0.000259 | Up |
| Biotic | AT5G64810 | 2.125814 | 1.81E-06 | Up |
| Biotic | AT3G53150 | 2.119596 | 0.001403 | Up |
| Biotic | AT3G45330 | 2.106738 | 0.000216 | Up |
| Biotic | AT4G39610 | 2.103038 | 0.000135 | Up |
| Biotic | AT1G74190 | 2.093231 | 0.00331  | Up |
| Biotic | AT4G28420 | 2.093105 | 4.79E-05 | Up |
| Biotic | AT2G47950 | 2.087628 | 0.001558 | Up |
| Biotic | AT3G48850 | 2.082971 | 1.33E-05 | Up |
| Biotic | AT4G31950 | 2.079134 | 0.000377 | Up |
| Biotic | AT1G17615 | 2.077653 | 0.000174 | Up |
| Biotic | AT4G23150 | 2.077439 | 2.73E-05 | Up |
| Biotic | AT5G66890 | 2.061989 | 0.000386 | Up |
| Biotic | AT1G26970 | 2.061003 | 0.006235 | Up |
| Biotic | AT1G57650 | 2.049015 | 2.57E-05 | Up |
| Biotic | AT2G35980 | 2.041576 | 6.67E-06 | Up |
| Biotic | AT3G55450 | 2.035884 | 5.15E-05 | Up |
| Biotic | AT1G13520 | 2.030538 | 4.14E-05 | Up |
| Biotic | AT4G17660 | 2.028918 | 0.004809 | Up |
| Biotic | AT5G13080 | 2.028796 | 9.45E-05 | Up |
| Biotic | AT3G13435 | 2.026638 | 0.000166 | Up |
| Biotic | AT3G61930 | 2.024049 | 0.004793 | Up |
| Biotic | AT4G04480 | 2.00865  | 0.001291 | Up |
| Biotic | AT1G21240 | 2.006397 | 0.002373 | Up |
| Biotic | AT3G44350 | 2.005855 | 0.000584 | Up |
| Biotic | AT5G63225 | 2.002857 | 0.000565 | Up |

---

---

|        |           |          |          |    |
|--------|-----------|----------|----------|----|
| Biotic | AT1G51860 | 2.000617 | 0.002418 | Up |
| Biotic | AT2G45220 | 1.990432 | 9.12E-06 | Up |
| Biotic | AT3G22600 | 1.98709  | 2.32E-05 | Up |
| Biotic | AT5G44990 | 1.984321 | 5.78E-06 | Up |
| Biotic | AT3G28580 | 1.97711  | 1.29E-05 | Up |
| Biotic | AT5G64905 | 1.968588 | 2.09E-06 | Up |
| Biotic | AT2G01379 | 1.96813  | 0.008879 | Up |
| Biotic | AT3G47480 | 1.95803  | 2.72E-05 | Up |
| Biotic | AT4G22070 | 1.957596 | 0.002949 | Up |
| Biotic | AT1G61550 | 1.9538   | 0.000111 | Up |
| Biotic | AT3G13950 | 1.948085 | 0.00014  | Up |
| Biotic | AT1G69920 | 1.945559 | 0.003843 | Up |
| Biotic | AT3G61390 | 1.938575 | 0.008806 | Up |
| Biotic | AT1G68150 | 1.928997 | 0.001881 | Up |
| Biotic | AT4G18430 | 1.927383 | 4.38E-06 | Up |
| Biotic | AT2G19190 | 1.918824 | 2.5E-05  | Up |
| Biotic | AT5G53990 | 1.915598 | 0.001824 | Up |
| Biotic | AT1G66610 | 1.904713 | 0.005927 | Up |
| Biotic | AT1G75040 | 1.902885 | 0.000655 | Up |
| Biotic | AT1G08860 | 1.902077 | 4.52E-05 | Up |
| Biotic | AT4G14630 | 1.900535 | 0.000124 | Up |
| Biotic | AT4G11480 | 1.89759  | 8.33E-05 | Up |
| Biotic | AT5G15130 | 1.885258 | 0.00833  | Up |
| Biotic | AT5G02780 | 1.879536 | 0.000401 | Up |
| Biotic | AT1G68620 | 1.866561 | 8.3E-05  | Up |
| Biotic | AT3G46090 | 1.864218 | 0.005286 | Up |
| Biotic | AT1G52900 | 1.859726 | 0.004496 | Up |
| Biotic | AT1G51890 | 1.858084 | 1.77E-08 | Up |
| Biotic | AT2G39530 | 1.855194 | 9.29E-05 | Up |
| Biotic | AT1G33730 | 1.850293 | 0.002352 | Up |
| Biotic | AT4G10500 | 1.84891  | 7.54E-05 | Up |
| Biotic | AT4G04540 | 1.844797 | 0.008074 | Up |
| Biotic | AT2G14610 | 1.837901 | 0.001138 | Up |
| Biotic | AT2G33080 | 1.829261 | 0.000353 | Up |
| Biotic | AT3G07900 | 1.825866 | 0.000401 | Up |
| Biotic | AT2G30750 | 1.824366 | 2.92E-08 | Up |
| Biotic | AT5G44480 | 1.821275 | 1.81E-06 | Up |
| Biotic | AT3G09280 | 1.819345 | 0.004735 | Up |
| Biotic | AT5G48410 | 1.819139 | 0.000184 | Up |
| Biotic | AT2G34500 | 1.813608 | 0.000274 | Up |
| Biotic | AT5G64000 | 1.809519 | 0.001113 | Up |
| Biotic | AT1G65970 | 1.809094 | 0.000869 | Up |
| Biotic | AT1G36640 | 1.806414 | 7.65E-05 | Up |
| Biotic | AT3G57100 | 1.803208 | 0.006319 | Up |
| Biotic | AT1G76480 | 1.802927 | 0.005395 | Up |
| Biotic | AT1G53625 | 1.788352 | 0.000116 | Up |
| Biotic | AT5G64890 | 1.788181 | 0.00024  | Up |
| Biotic | AT1G65690 | 1.78127  | 1.49E-05 | Up |
| Biotic | AT2G40740 | 1.779302 | 0.002121 | Up |
| Biotic | AT2G29460 | 1.778419 | 0.000181 | Up |
| Biotic | AT5G42380 | 1.777478 | 0.000951 | Up |

---

---

|        |           |          |          |    |
|--------|-----------|----------|----------|----|
| Biotic | AT5G48400 | 1.763284 | 0.000331 | Up |
| Biotic | AT1G26390 | 1.759017 | 1.55E-06 | Up |
| Biotic | AT2G18660 | 1.756074 | 0.000271 | Up |
| Biotic | AT4G13890 | 1.749671 | 0.004583 | Up |
| Biotic | AT1G70170 | 1.746077 | 0.00045  | Up |
| Biotic | AT1G26380 | 1.732755 | 2.45E-07 | Up |
| Biotic | AT5G60800 | 1.729624 | 6.67E-06 | Up |
| Biotic | AT4G09300 | 1.728776 | 0.0006   | Up |
| Biotic | AT1G34180 | 1.72101  | 0.00149  | Up |
| Biotic | AT5G24910 | 1.715333 | 0.00884  | Up |
| Biotic | AT3G01760 | 1.712836 | 0.009482 | Up |
| Biotic | AT1G33030 | 1.712623 | 0.000108 | Up |
| Biotic | AT2G46400 | 1.708222 | 0.00789  | Up |
| Biotic | AT5G38250 | 1.705703 | 0.006588 | Up |
| Biotic | AT3G21080 | 1.702575 | 2.45E-07 | Up |
| Biotic | AT1G72540 | 1.699591 | 5.21E-05 | Up |
| Biotic | AT1G69930 | 1.698641 | 0.000745 | Up |
| Biotic | AT2G04450 | 1.69785  | 0.007513 | Up |
| Biotic | AT5G26920 | 1.697804 | 7.3E-05  | Up |
| Biotic | AT2G33130 | 1.695533 | 0.003492 | Up |
| Biotic | AT4G38560 | 1.691773 | 0.000209 | Up |
| Biotic | AT5G67310 | 1.68279  | 0.001138 | Up |
| Biotic | AT1G32960 | 1.681008 | 0.000475 | Up |
| Biotic | AT3G46770 | 1.675044 | 0.001416 | Up |
| Biotic | AT1G35230 | 1.672779 | 0.001285 | Up |
| Biotic | AT1G21310 | 1.67167  | 0.007041 | Up |
| Biotic | AT2G04430 | 1.668787 | 0.000124 | Up |
| Biotic | AT1G47890 | 1.65743  | 0.001311 | Up |
| Biotic | AT1G09932 | 1.652259 | 0.000867 | Up |
| Biotic | AT2G23270 | 1.648256 | 0.000117 | Up |
| Biotic | AT4G00700 | 1.647854 | 0.009332 | Up |
| Biotic | AT2G43000 | 1.639765 | 1.7E-06  | Up |
| Biotic | AT1G13480 | 1.636149 | 0.000726 | Up |
| Biotic | AT1G65483 | 1.634492 | 0.000502 | Up |
| Biotic | AT1G07900 | 1.628637 | 3.05E-05 | Up |
| Biotic | AT4G23700 | 1.627608 | 1.26E-05 | Up |
| Biotic | AT1G74080 | 1.627014 | 7.33E-08 | Up |
| Biotic | AT1G02470 | 1.619349 | 0.009889 | Up |
| Biotic | AT5G17760 | 1.607242 | 0.00021  | Up |
| Biotic | AT4G14368 | 1.607028 | 0.000405 | Up |
| Biotic | AT4G16260 | 1.604504 | 0.000293 | Up |
| Biotic | AT3G57260 | 1.604089 | 0.000146 | Up |
| Biotic | AT5G22530 | 1.599649 | 0.000121 | Up |
| Biotic | AT1G14080 | 1.599597 | 0.001463 | Up |
| Biotic | AT1G57560 | 1.597681 | 5.84E-05 | Up |
| Biotic | AT4G04500 | 1.597077 | 0.004909 | Up |
| Biotic | AT2G34580 | 1.591258 | 0.000461 | Up |
| Biotic | AT3G60966 | 1.590164 | 0.000896 | Up |
| Biotic | AT5G54700 | 1.584787 | 0.002057 | Up |
| Biotic | AT3G60120 | 1.582596 | 0.00026  | Up |
| Biotic | AT5G51465 | 1.578981 | 0.00686  | Up |

---

---

|        |           |          |          |    |
|--------|-----------|----------|----------|----|
| Biotic | AT4G39030 | 1.578548 | 0.001165 | Up |
| Biotic | AT1G09080 | 1.571278 | 0.001907 | Up |
| Biotic | AT3G15536 | 1.569125 | 0.000151 | Up |
| Biotic | AT2G24850 | 1.566741 | 0.000907 | Up |
| Biotic | AT3G55150 | 1.566467 | 0.000462 | Up |
| Biotic | AT5G52760 | 1.565498 | 0.006158 | Up |
| Biotic | AT3G13100 | 1.561185 | 0.000306 | Up |
| Biotic | AT5G01550 | 1.557819 | 0.001854 | Up |
| Biotic | AT4G11890 | 1.545624 | 0.000456 | Up |
| Biotic | AT4G14450 | 1.541044 | 0.000189 | Up |
| Biotic | AT1G61800 | 1.539778 | 3.33E-05 | Up |
| Biotic | AT1G67980 | 1.537729 | 0.000208 | Up |
| Biotic | AT5G22380 | 1.535448 | 0.000337 | Up |
| Biotic | AT3G01830 | 1.534053 | 0.001516 | Up |
| Biotic | AT1G66170 | 1.531365 | 0.000138 | Up |
| Biotic | AT2G39518 | 1.529204 | 1.26E-05 | Up |
| Biotic | AT4G23610 | 1.526483 | 0.001481 | Up |
| Biotic | AT1G14550 | 1.525674 | 0.000687 | Up |
| Biotic | AT3G04220 | 1.519593 | 0.004    | Up |
| Biotic | AT3G57460 | 1.518404 | 0.005413 | Up |
| Biotic | AT2G18690 | 1.51818  | 1.85E-06 | Up |
| Biotic | AT1G26420 | 1.516694 | 6.02E-08 | Up |
| Biotic | AT3G60415 | 1.514541 | 0.000204 | Up |
| Biotic | AT4G39670 | 1.51339  | 0.000436 | Up |
| Biotic | AT3G50480 | 1.49973  | 0.001439 | Up |
| Biotic | AT1G68765 | 1.498249 | 0.003409 | Up |
| Biotic | AT4G39675 | 1.491991 | 0.004134 | Up |
| Biotic | AT2G04495 | 1.483244 | 0.001098 | Up |
| Biotic | AT1G16420 | 1.482524 | 0.000253 | Up |
| Biotic | AT5G24110 | 1.480719 | 9.46E-05 | Up |
| Biotic | AT4G15417 | 1.470257 | 2.5E-05  | Up |
| Biotic | AT4G05020 | 1.466395 | 5.66E-06 | Up |
| Biotic | AT2G25440 | 1.463867 | 0.008363 | Up |
| Biotic | AT5G44567 | 1.461685 | 0.00218  | Up |
| Biotic | AT4G26120 | 1.460455 | 2.17E-08 | Up |
| Biotic | AT3G28210 | 1.453761 | 0.008659 | Up |
| Biotic | AT5G57510 | 1.453638 | 0.000482 | Up |
| Biotic | AT2G32460 | 1.451215 | 0.007647 | Up |
| Biotic | AT4G12490 | 1.448671 | 2.25E-05 | Up |
| Biotic | AT3G18250 | 1.448312 | 0.000138 | Up |
| Biotic | AT3G60961 | 1.44632  | 0.000909 | Up |
| Biotic | AT3G17690 | 1.446215 | 0.002756 | Up |
| Biotic | AT2G31865 | 1.442568 | 9.15E-05 | Up |
| Biotic | AT4G12500 | 1.442564 | 2.55E-06 | Up |
| Biotic | AT1G02920 | 1.438936 | 1.44E-07 | Up |
| Biotic | AT1G78410 | 1.426742 | 4.44E-05 | Up |
| Biotic | AT1G51920 | 1.426101 | 0.000107 | Up |
| Biotic | AT1G01480 | 1.425729 | 0.000462 | Up |
| Biotic | AT5G57010 | 1.422674 | 0.002702 | Up |
| Biotic | AT5G02490 | 1.421286 | 0.001024 | Up |
| Biotic | AT2G27389 | 1.416658 | 0.006943 | Up |

---

---

|        |           |          |          |    |
|--------|-----------|----------|----------|----|
| Biotic | AT4G35180 | 1.411715 | 1.34E-05 | Up |
| Biotic | AT3G26830 | 1.407252 | 1.12E-05 | Up |
| Biotic | AT1G60740 | 1.399015 | 0.000252 | Up |
| Biotic | AT5G47850 | 1.398534 | 0.001096 | Up |
| Biotic | AT4G03450 | 1.394284 | 0.004321 | Up |
| Biotic | AT1G56060 | 1.379882 | 0.000141 | Up |
| Biotic | AT1G36622 | 1.379427 | 9.12E-06 | Up |
| Biotic | AT1G14540 | 1.375355 | 3.71E-05 | Up |
| Biotic | AT2G30550 | 1.365453 | 4.35E-05 | Up |
| Biotic | AT1G30700 | 1.355997 | 3.05E-05 | Up |
| Biotic | AT3G02190 | 1.353751 | 0.004791 | Up |
| Biotic | AT4G01720 | 1.351457 | 0.001916 | Up |
| Biotic | AT1G47510 | 1.349378 | 0.001523 | Up |
| Biotic | AT1G32940 | 1.348337 | 2.72E-05 | Up |
| Biotic | AT5G67340 | 1.345307 | 8.45E-05 | Up |
| Biotic | AT4G25070 | 1.342356 | 0.000763 | Up |
| Biotic | AT3G47780 | 1.340489 | 0.000329 | Up |
| Biotic | AT5G26170 | 1.333423 | 0.003369 | Up |
| Biotic | AT4G11170 | 1.332303 | 1.46E-05 | Up |
| Biotic | AT1G02220 | 1.328264 | 4.38E-06 | Up |
| Biotic | AT5G62150 | 1.327007 | 5.41E-05 | Up |
| Biotic | AT2G38340 | 1.32218  | 0.000327 | Up |
| Biotic | AT4G01540 | 1.319456 | 0.006834 | Up |
| Biotic | AT4G14365 | 1.310812 | 9.81E-05 | Up |
| Biotic | AT5G18270 | 1.307677 | 0.002606 | Up |
| Biotic | AT1G74590 | 1.303631 | 6.36E-05 | Up |
| Biotic | AT1G14870 | 1.300308 | 4.51E-06 | Up |
| Biotic | AT3G13090 | 1.297853 | 5.22E-05 | Up |
| Biotic | AT1G30900 | 1.297187 | 0.001053 | Up |
| Biotic | AT4G18253 | 1.294136 | 0.003979 | Up |
| Biotic | AT1G67520 | 1.293534 | 0.00012  | Up |
| Biotic | AT1G76040 | 1.290884 | 8.45E-05 | Up |
| Biotic | AT1G51913 | 1.287099 | 0.003235 | Up |
| Biotic | AT1G13470 | 1.285756 | 0.003039 | Up |
| Biotic | AT4G28460 | 1.283256 | 0.000542 | Up |
| Biotic | AT5G01250 | 1.28298  | 0.001431 | Up |
| Biotic | AT3G51330 | 1.279444 | 0.002131 | Up |
| Biotic | AT1G47980 | 1.279092 | 0.005352 | Up |
| Biotic | AT1G58225 | 1.278117 | 0.001043 | Up |
| Biotic | AT1G79450 | 1.27552  | 0.000706 | Up |
| Biotic | AT2G32140 | 1.274465 | 0.004497 | Up |
| Biotic | AT1G26240 | 1.27183  | 0.000421 | Up |
| Biotic | AT3G57380 | 1.271821 | 0.001896 | Up |
| Biotic | AT1G02930 | 1.270488 | 1.29E-05 | Up |
| Biotic | AT1G01560 | 1.269993 | 0.000988 | Up |
| Biotic | AT5G43910 | 1.26888  | 0.000688 | Up |
| Biotic | AT3G24900 | 1.268031 | 0.000749 | Up |
| Biotic | AT5G27765 | 1.26765  | 0.000311 | Up |
| Biotic | AT4G26470 | 1.267649 | 0.001436 | Up |
| Biotic | AT4G15270 | 1.266726 | 0.008867 | Up |
| Biotic | AT2G21910 | 1.262499 | 0.001289 | Up |

---

---

|        |           |          |          |    |
|--------|-----------|----------|----------|----|
| Biotic | AT4G31970 | 1.261875 | 0.001358 | Up |
| Biotic | AT1G08050 | 1.258806 | 0.00139  | Up |
| Biotic | AT3G25250 | 1.257112 | 7.65E-05 | Up |
| Biotic | AT4G39830 | 1.251721 | 0.000736 | Up |
| Biotic | AT5G01900 | 1.251166 | 0.006091 | Up |
| Biotic | AT3G50770 | 1.250484 | 0.001979 | Up |
| Biotic | AT5G05340 | 1.2455   | 7.78E-05 | Up |
| Biotic | AT1G75170 | 1.244092 | 0.000246 | Up |
| Biotic | AT2G29110 | 1.24366  | 0.003023 | Up |
| Biotic | AT4G20110 | 1.240831 | 0.003948 | Up |
| Biotic | AT1G15625 | 1.239847 | 0.000465 | Up |
| Biotic | AT3G09940 | 1.236711 | 0.003969 | Up |
| Biotic | AT5G52810 | 1.23345  | 0.000395 | Up |
| Biotic | AT1G24145 | 1.233161 | 0.000734 | Up |
| Biotic | AT5G08240 | 1.233039 | 0.008848 | Up |
| Biotic | AT3G25510 | 1.230031 | 0.000259 | Up |
| Biotic | AT4G23030 | 1.22809  | 0.001613 | Up |
| Biotic | AT4G02520 | 1.224718 | 0.001113 | Up |
| Biotic | AT5G66640 | 1.224293 | 0.004092 | Up |
| Biotic | AT4G02380 | 1.223923 | 0.000556 | Up |
| Biotic | AT4G23310 | 1.220771 | 0.006536 | Up |
| Biotic | AT2G44370 | 1.217982 | 0.000349 | Up |
| Biotic | AT1G77810 | 1.216512 | 5.07E-05 | Up |
| Biotic | AT4G08770 | 1.21511  | 7.65E-05 | Up |
| Biotic | AT3G28540 | 1.212891 | 0.001516 | Up |
| Biotic | AT3G11640 | 1.211929 | 0.002544 | Up |
| Biotic | AT1G76930 | 1.207493 | 2.32E-06 | Up |
| Biotic | AT5G47670 | 1.205061 | 0.002078 | Up |
| Biotic | AT3G01970 | 1.204757 | 0.000146 | Up |
| Biotic | AT4G14640 | 1.202945 | 0.000147 | Up |
| Biotic | AT2G29750 | 1.202548 | 0.009431 | Up |
| Biotic | AT2G20142 | 1.197296 | 4.24E-05 | Up |
| Biotic | AT4G20000 | 1.193569 | 1.82E-05 | Up |
| Biotic | AT2G17500 | 1.189326 | 0.003655 | Up |
| Biotic | AT1G73810 | 1.188715 | 0.001358 | Up |
| Biotic | AT1G22400 | 1.188245 | 4.45E-06 | Up |
| Biotic | AT1G73805 | 1.187372 | 0.000441 | Up |
| Biotic | AT4G19370 | 1.187297 | 0.000344 | Up |
| Biotic | AT1G24140 | 1.186745 | 2.16E-05 | Up |
| Biotic | AT5G09470 | 1.184602 | 0.00541  | Up |
| Biotic | AT4G35380 | 1.184317 | 0.000119 | Up |
| Biotic | AT5G51160 | 1.182257 | 0.008572 | Up |
| Biotic | AT3G13380 | 1.181546 | 0.000411 | Up |
| Biotic | AT4G36990 | 1.180772 | 2.71E-06 | Up |
| Biotic | AT3G63380 | 1.180294 | 4.52E-05 | Up |
| Biotic | AT5G16170 | 1.177518 | 0.000874 | Up |
| Biotic | AT2G37980 | 1.175858 | 7.28E-05 | Up |
| Biotic | AT3G26500 | 1.174347 | 0.000264 | Up |
| Biotic | AT3G47540 | 1.172898 | 0.000465 | Up |
| Biotic | AT1G70690 | 1.16968  | 0.001109 | Up |
| Biotic | AT2G47750 | 1.16518  | 0.000181 | Up |

---

---

|        |           |          |          |    |
|--------|-----------|----------|----------|----|
| Biotic | AT5G07650 | 1.163906 | 8.34E-06 | Up |
| Biotic | AT3G48020 | 1.162427 | 0.005208 | Up |
| Biotic | AT3G46690 | 1.16091  | 0.007394 | Up |
| Biotic | AT3G26470 | 1.16078  | 2.42E-05 | Up |
| Biotic | AT5G56960 | 1.160707 | 0.002994 | Up |
| Biotic | AT3G25610 | 1.160465 | 1.17E-05 | Up |
| Biotic | AT1G06983 | 1.157217 | 0.005706 | Up |
| Biotic | AT2G18680 | 1.15588  | 0.000105 | Up |
| Biotic | AT3G44326 | 1.152181 | 0.001545 | Up |
| Biotic | AT4G18250 | 1.151113 | 6.21E-05 | Up |
| Biotic | AT2G41380 | 1.147002 | 0.001821 | Up |
| Biotic | AT4G23140 | 1.146836 | 0.006178 | Up |
| Biotic | AT3G01420 | 1.146607 | 0.00014  | Up |
| Biotic | AT5G53110 | 1.143944 | 0.000199 | Up |
| Biotic | AT4G28390 | 1.143868 | 0.000113 | Up |
| Biotic | AT5G48657 | 1.143562 | 0.000125 | Up |
| Biotic | AT5G61490 | 1.139318 | 0.001611 | Up |
| Biotic | AT2G15760 | 1.138448 | 0.000252 | Up |
| Biotic | AT2G35730 | 1.131675 | 0.008006 | Up |
| Biotic | AT1G27045 | 1.125722 | 0.000368 | Up |
| Biotic | AT1G67810 | 1.124808 | 0.002354 | Up |
| Biotic | AT1G76980 | 1.123793 | 0.000141 | Up |
| Biotic | AT4G23210 | 1.121884 | 0.003113 | Up |
| Biotic | AT4G36430 | 1.120251 | 5.48E-07 | Up |
| Biotic | AT4G26270 | 1.11965  | 9.81E-05 | Up |
| Biotic | AT4G22670 | 1.117474 | 0.009286 | Up |
| Biotic | AT2G04070 | 1.116127 | 0.000421 | Up |
| Biotic | AT3G44830 | 1.104863 | 0.000858 | Up |
| Biotic | AT2G25297 | 1.104742 | 0.00012  | Up |
| Biotic | AT1G64065 | 1.104021 | 0.000569 | Up |
| Biotic | AT2G44290 | 1.103747 | 1.81E-06 | Up |
| Biotic | AT1G07620 | 1.102969 | 0.000167 | Up |
| Biotic | AT2G38860 | 1.098112 | 7.57E-06 | Up |
| Biotic | AT3G05500 | 1.097676 | 2.63E-05 | Up |
| Biotic | AT4G37390 | 1.095828 | 0.007521 | Up |
| Biotic | AT2G28710 | 1.095475 | 8.28E-05 | Up |
| Biotic | AT4G23280 | 1.092032 | 0.000103 | Up |
| Biotic | AT2G17740 | 1.089929 | 2.72E-05 | Up |
| Biotic | AT1G66410 | 1.087874 | 0.000421 | Up |
| Biotic | AT2G45570 | 1.08762  | 0.003891 | Up |
| Biotic | AT3G26840 | 1.087361 | 1.08E-05 | Up |
| Biotic | AT5G45000 | 1.084896 | 0.00466  | Up |
| Biotic | AT3G22160 | 1.084207 | 1.22E-05 | Up |
| Biotic | AT5G24210 | 1.082467 | 1.26E-05 | Up |
| Biotic | AT1G60730 | 1.082249 | 0.000105 | Up |
| Biotic | AT1G07160 | 1.081487 | 0.001626 | Up |
| Biotic | AT1G02520 | 1.080656 | 0.000225 | Up |
| Biotic | AT4G26990 | 1.080546 | 0.000129 | Up |
| Biotic | AT4G07820 | 1.075641 | 0.000012 | Up |
| Biotic | AT3G52340 | 1.075321 | 8.87E-07 | Up |
| Biotic | AT5G58940 | 1.074611 | 9.12E-06 | Up |

---

|        |           |          |          |      |
|--------|-----------|----------|----------|------|
| Biotic | AT3G54150 | 1.073883 | 0.000842 | Up   |
| Biotic | AT5G28646 | 1.067422 | 0.006842 | Up   |
| Biotic | AT1G69520 | 1.067404 | 0.000377 | Up   |
| Biotic | AT2G37620 | 1.065064 | 0.002292 | Up   |
| Biotic | AT4G17670 | 1.064348 | 0.001966 | Up   |
| Biotic | AT5G42010 | 1.061331 | 0.000788 | Up   |
| Biotic | AT5G20960 | 1.059203 | 0.00263  | Up   |
| Biotic | AT1G48605 | 1.054523 | 9.31E-05 | Up   |
| Biotic | AT4G37900 | 1.053415 | 0.000104 | Up   |
| Biotic | AT3G26210 | 1.050086 | 0.003866 | Up   |
| Biotic | AT1G67920 | 1.047635 | 0.003967 | Up   |
| Biotic | AT5G07780 | 1.046389 | 0.004918 | Up   |
| Biotic | AT2G38250 | 1.045102 | 0.0008   | Up   |
| Biotic | AT3G11000 | 1.043443 | 0.000201 | Up   |
| Biotic | AT1G64610 | 1.042753 | 2.5E-05  | Up   |
| Biotic | AT5G59530 | 1.037645 | 0.00013  | Up   |
| Biotic | AT1G63840 | 1.037526 | 0.000182 | Up   |
| Biotic | AT4G10960 | 1.036391 | 0.00011  | Up   |
| Biotic | AT5G64120 | 1.026806 | 1.07E-05 | Up   |
| Biotic | AT1G51420 | 1.026407 | 0.000245 | Up   |
| Biotic | AT3G09010 | 1.025679 | 0.000684 | Up   |
| Biotic | AT5G24090 | 1.023572 | 0.000225 | Up   |
| Biotic | AT3G12910 | 1.021173 | 0.001107 | Up   |
| Biotic | AT2G47000 | 1.020643 | 7.89E-05 | Up   |
| Biotic | AT5G46230 | 1.018154 | 0.006221 | Up   |
| Biotic | AT2G29990 | 1.016202 | 0.000225 | Up   |
| Biotic | AT2G43620 | 1.015706 | 1.81E-06 | Up   |
| Biotic | AT1G10417 | 1.012983 | 0.006668 | Up   |
| Biotic | AT3G23600 | 1.00708  | 0.002912 | Up   |
| Biotic | AT3G08970 | 1.006956 | 0.002878 | Up   |
| Biotic | AT5G25820 | 1.006618 | 0.001394 | Up   |
| Biotic | AT4G37030 | 1.003489 | 0.00054  | Up   |
| Biotic | AT3G52460 | 1.002525 | 0.000132 | Up   |
| Biotic | AT5G57480 | 1.001412 | 0.000141 | Up   |
| Biotic | AT1G12290 | 1.000513 | 0.000122 | Up   |
| Biotic | AT2G29300 | -1.01664 | 0.002405 | Down |
| Biotic | AT5G65730 | -1.02736 | 0.00054  | Down |
| Biotic | AT1G59720 | -1.04258 | 0.008107 | Down |
| Biotic | AT5G10250 | -1.07941 | 2.13E-05 | Down |
| Biotic | AT5G25240 | -1.11364 | 0.005128 | Down |
| Biotic | AT2G23690 | -1.20432 | 0.000972 | Down |
| Biotic | AT1G50040 | -1.28795 | 0.007874 | Down |
| Biotic | AT1G13650 | -1.29366 | 0.000129 | Down |
| Biotic | AT5G24640 | -1.33816 | 0.005651 | Down |
| Biotic | AT2G20670 | -1.33837 | 0.000163 | Down |
| Biotic | AT1G62510 | -1.342   | 1.35E-05 | Down |
| Biotic | AT4G08950 | -1.3784  | 3.8E-05  | Down |
| Biotic | AT2G27420 | -1.41201 | 0.000157 | Down |
| Biotic | AT5G62730 | -1.43547 | 0.009907 | Down |
| Biotic | AT3G48360 | -1.49299 | 0.001403 | Down |
| Biotic | AT5G08150 | -1.55175 | 0.000556 | Down |

|         |           |          |          |      |
|---------|-----------|----------|----------|------|
| Biotic  | AT1G21910 | -1.62105 | 1.15E-05 | Down |
| Biotic  | AT3G45970 | -1.71122 | 4.32E-08 | Down |
| Biotic  | AT5G57560 | -2.11846 | 0.000159 | Down |
| Biotic  | AT1G35140 | -2.80687 | 0.000617 | Down |
| Biotic  | AT2G33847 | -3.78792 | 0.004733 | Down |
| Abiotic | AT1G01470 | 1.412094 | 2.28E-06 | Up   |
| Abiotic | AT1G01720 | 1.360304 | 1.94E-06 | Up   |
| Abiotic | AT1G01810 | 1.470931 | 2.72E-07 | Up   |
| Abiotic | AT1G01940 | 1.053412 | 4.04E-06 | Up   |
| Abiotic | AT1G02300 | 1.05793  | 4.23E-08 | Up   |
| Abiotic | AT1G02390 | 1.360029 | 7.84E-08 | Up   |
| Abiotic | AT1G02980 | 1.323106 | 4.22E-05 | Up   |
| Abiotic | AT1G04570 | 1.979582 | 2.13E-14 | Up   |
| Abiotic | AT1G05340 | 1.166264 | 0.000176 | Up   |
| Abiotic | AT1G07330 | 1.546117 | 1.87E-06 | Up   |
| Abiotic | AT1G07400 | 1.413668 | 2.84E-06 | Up   |
| Abiotic | AT1G07430 | 2.291214 | 2.14E-11 | Up   |
| Abiotic | AT1G07900 | 1.081077 | 0.000505 | Up   |
| Abiotic | AT1G08440 | 1.462686 | 1.02E-05 | Up   |
| Abiotic | AT1G09157 | 1.118113 | 0.000262 | Up   |
| Abiotic | AT1G09950 | 2.372008 | 1.67E-12 | Up   |
| Abiotic | AT1G10170 | 1.268525 | 1.28E-08 | Up   |
| Abiotic | AT1G10560 | 1.080764 | 7.99E-05 | Up   |
| Abiotic | AT1G11210 | 1.209469 | 0.000122 | Up   |
| Abiotic | AT1G12290 | 1.256694 | 1.93E-07 | Up   |
| Abiotic | AT1G13370 | 1.011361 | 9.99E-05 | Up   |
| Abiotic | AT1G14205 | 1.11352  | 4.41E-06 | Up   |
| Abiotic | AT1G14360 | 1.154751 | 4.49E-07 | Up   |
| Abiotic | AT1G14880 | 1.205301 | 0.000168 | Up   |
| Abiotic | AT1G15580 | 1.028729 | 0.000121 | Up   |
| Abiotic | AT1G16850 | 1.883867 | 2.42E-08 | Up   |
| Abiotic | AT1G17380 | 1.437237 | 9.96E-07 | Up   |
| Abiotic | AT1G17420 | 1.068209 | 1.86E-05 | Up   |
| Abiotic | AT1G18830 | 1.26401  | 2.09E-05 | Up   |
| Abiotic | AT1G19180 | 1.153287 | 0.000104 | Up   |
| Abiotic | AT1G20150 | 1.102255 | 0.000404 | Up   |
| Abiotic | AT1G20440 | 1.264115 | 8.54E-06 | Up   |
| Abiotic | AT1G20450 | 1.539082 | 3.88E-08 | Up   |
| Abiotic | AT1G22110 | 1.335377 | 1.46E-05 | Up   |
| Abiotic | AT1G22370 | 1.041949 | 2.23E-06 | Up   |
| Abiotic | AT1G27730 | 1.036076 | 0.0008   | Up   |
| Abiotic | AT1G28370 | 1.061659 | 0.000469 | Up   |
| Abiotic | AT1G29395 | 1.199723 | 7.77E-05 | Up   |
| Abiotic | AT1G29640 | 1.076143 | 0.000171 | Up   |
| Abiotic | AT1G30135 | 1.428899 | 1.03E-05 | Up   |
| Abiotic | AT1G30190 | 1.509482 | 2.57E-06 | Up   |
| Abiotic | AT1G31243 | 1.102553 | 0.00046  | Up   |
| Abiotic | AT1G32870 | 1.231998 | 4.51E-08 | Up   |
| Abiotic | AT1G32900 | 1.120188 | 0.000103 | Up   |
| Abiotic | AT1G35720 | 1.141944 | 1.62E-05 | Up   |
| Abiotic | AT1G35730 | 2.324076 | 1.71E-11 | Up   |

---

|         |           |          |          |    |
|---------|-----------|----------|----------|----|
| Abiotic | AT1G45145 | 1.082066 | 0.000298 | Up |
| Abiotic | AT1G47510 | 1.217084 | 0.000109 | Up |
| Abiotic | AT1G48720 | 1.78324  | 1.79E-07 | Up |
| Abiotic | AT1G50400 | 1.082031 | 2.06E-06 | Up |
| Abiotic | AT1G50780 | 1.188516 | 0.000211 | Up |
| Abiotic | AT1G52560 | 1.230344 | 7.37E-05 | Up |
| Abiotic | AT1G52690 | 1.049219 | 0.000535 | Up |
| Abiotic | AT1G52890 | 1.507434 | 6.29E-06 | Up |
| Abiotic | AT1G53540 | 1.702725 | 3.70E-07 | Up |
| Abiotic | AT1G53885 | 1.244554 | 8.50E-05 | Up |
| Abiotic | AT1G53903 | 1.032248 | 0.000842 | Up |
| Abiotic | AT1G54040 | 1.141391 | 1.91E-05 | Up |
| Abiotic | AT1G54160 | 1.267694 | 4.63E-10 | Up |
| Abiotic | AT1G54773 | 1.036977 | 1.47E-05 | Up |
| Abiotic | AT1G56300 | 1.310266 | 9.42E-06 | Up |
| Abiotic | AT1G56600 | 1.227115 | 9.28E-05 | Up |
| Abiotic | AT1G56650 | 1.124154 | 5.07E-05 | Up |
| Abiotic | AT1G59865 | 1.8717   | 3.02E-09 | Up |
| Abiotic | AT1G60190 | 1.992208 | 2.86E-09 | Up |
| Abiotic | AT1G61340 | 1.849008 | 4.60E-10 | Up |
| Abiotic | AT1G61470 | 1.118692 | 8.70E-07 | Up |
| Abiotic | AT1G61800 | 2.496775 | 2.56E-13 | Up |
| Abiotic | AT1G62290 | 1.213242 | 2.48E-05 | Up |
| Abiotic | AT1G62710 | 1.225198 | 1.56E-05 | Up |
| Abiotic | AT1G63550 | 1.046426 | 0.000445 | Up |
| Abiotic | AT1G63570 | 1.022219 | 0.000902 | Up |
| Abiotic | AT1G63730 | 1.102463 | 9.71E-09 | Up |
| Abiotic | AT1G64200 | 1.108849 | 4.77E-06 | Up |
| Abiotic | AT1G64210 | 1.006854 | 0.000612 | Up |
| Abiotic | AT1G64360 | 1.131972 | 0.000339 | Up |
| Abiotic | AT1G64561 | 1.029882 | 0.000112 | Up |
| Abiotic | AT1G64563 | 2.122364 | 5.14E-12 | Up |
| Abiotic | AT1G65890 | 1.116714 | 0.00024  | Up |
| Abiotic | AT1G66500 | 2.325331 | 1.30E-15 | Up |
| Abiotic | AT1G66510 | 1.173192 | 2.24E-07 | Up |
| Abiotic | AT1G67220 | 1.278817 | 7.25E-05 | Up |
| Abiotic | AT1G67360 | 2.57439  | 6.18E-17 | Up |
| Abiotic | AT1G67370 | 1.17609  | 9.83E-06 | Up |
| Abiotic | AT1G67623 | 1.322649 | 4.58E-05 | Up |
| Abiotic | AT1G67920 | 1.64455  | 4.83E-07 | Up |
| Abiotic | AT1G68050 | 1.009026 | 0.00085  | Up |
| Abiotic | AT1G68300 | 1.273905 | 3.27E-07 | Up |
| Abiotic | AT1G68765 | 1.02143  | 0.000896 | Up |
| Abiotic | AT1G68930 | 1.073771 | 4.84E-08 | Up |
| Abiotic | AT1G69490 | 1.264256 | 3.16E-05 | Up |
| Abiotic | AT1G69790 | 1.012376 | 0.000914 | Up |
| Abiotic | AT1G70300 | 1.00072  | 2.92E-05 | Up |
| Abiotic | AT1G70640 | 1.948032 | 2.79E-09 | Up |
| Abiotic | AT1G70800 | 1.567129 | 1.08E-07 | Up |
| Abiotic | AT1G71000 | 1.458847 | 1.13E-05 | Up |
| Abiotic | AT1G72660 | 3.26531  | 3.36E-23 | Up |

---

---

|         |           |          |          |    |
|---------|-----------|----------|----------|----|
| Abiotic | AT1G72760 | 1.656339 | 2.13E-08 | Up |
| Abiotic | AT1G72900 | 1.149418 | 2.09E-05 | Up |
| Abiotic | AT1G73066 | 1.168472 | 4.52E-07 | Up |
| Abiotic | AT1G73480 | 1.438863 | 5.99E-07 | Up |
| Abiotic | AT1G73880 | 1.066387 | 6.98E-07 | Up |
| Abiotic | AT1G74930 | 1.94941  | 8.79E-12 | Up |
| Abiotic | AT1G75600 | 1.555927 | 3.04E-06 | Up |
| Abiotic | AT1G76590 | 1.728603 | 6.48E-09 | Up |
| Abiotic | AT1G76650 | 1.086642 | 5.95E-05 | Up |
| Abiotic | AT1G77000 | 1.587578 | 1.16E-09 | Up |
| Abiotic | AT1G77120 | 1.539463 | 1.84E-06 | Up |
| Abiotic | AT1G78070 | 1.470111 | 1.23E-08 | Up |
| Abiotic | AT1G78380 | 1.191313 | 7.35E-07 | Up |
| Abiotic | AT1G78390 | 1.448023 | 1.19E-05 | Up |
| Abiotic | AT1G78680 | 1.132498 | 8.79E-07 | Up |
| Abiotic | AT1G79920 | 1.107758 | 2.89E-07 | Up |
| Abiotic | AT1G80110 | 1.113079 | 6.13E-07 | Up |
| Abiotic | AT1G80120 | 1.150504 | 3.37E-05 | Up |
| Abiotic | AT1G80130 | 1.584303 | 1.04E-06 | Up |
| Abiotic | AT1G80660 | 1.525226 | 3.91E-07 | Up |
| Abiotic | AT2G01008 | 2.353944 | 4.93E-12 | Up |
| Abiotic | AT2G07776 | 1.289219 | 2.16E-05 | Up |
| Abiotic | AT2G07749 | 1.006202 | 0.00111  | Up |
| Abiotic | AT2G07777 | 1.666294 | 6.47E-08 | Up |
| Abiotic | AT2G07671 | 1.330315 | 2.49E-05 | Up |
| Abiotic | AT2G07779 | 1.634476 | 9.87E-07 | Up |
| Abiotic | AT2G07672 | 1.637997 | 1.26E-06 | Up |
| Abiotic | AT2G07674 | 1.238647 | 0.000104 | Up |
| Abiotic | AT2G07678 | 1.834545 | 5.35E-08 | Up |
| Abiotic | AT2G07774 | 1.36831  | 3.09E-06 | Up |
| Abiotic | AT2G07687 | 1.341501 | 2.98E-05 | Up |
| Abiotic | AT2G07692 | 1.460353 | 1.15E-05 | Up |
| Abiotic | AT2G07695 | 1.362013 | 2.12E-05 | Up |
| Abiotic | AT2G07785 | 1.436726 | 7.29E-06 | Up |
| Abiotic | AT2G07599 | 1.006188 | 0.001101 | Up |
| Abiotic | AT2G07798 | 1.216732 | 0.000155 | Up |
| Abiotic | AT2G07698 | 1.822038 | 2.55E-08 | Up |
| Abiotic | AT2G07702 | 1.097551 | 0.000202 | Up |
| Abiotic | AT2G07706 | 1.109644 | 0.000438 | Up |
| Abiotic | AT2G07715 | 1.037431 | 7.25E-05 | Up |
| Abiotic | AT2G07648 | 1.087797 | 0.000361 | Up |
| Abiotic | AT2G07719 | 1.3497   | 1.85E-05 | Up |
| Abiotic | AT2G07652 | 1.441166 | 1.35E-05 | Up |
| Abiotic | AT2G07815 | 1.549459 | 8.57E-07 | Up |
| Abiotic | AT2G07724 | 1.422949 | 1.74E-05 | Up |
| Abiotic | AT2G07725 | 1.531272 | 2.22E-06 | Up |
| Abiotic | AT2G07728 | 1.139667 | 0.000254 | Up |
| Abiotic | AT2G07734 | 1.191911 | 0.000205 | Up |
| Abiotic | AT2G07775 | 1.271552 | 8.95E-05 | Up |
| Abiotic | AT2G07661 | 1.153292 | 0.000276 | Up |
| Abiotic | AT2G05365 | 1.131405 | 0.000229 | Up |

---

---

|         |           |          |          |    |
|---------|-----------|----------|----------|----|
| Abiotic | AT2G07738 | 1.138682 | 0.000168 | Up |
| Abiotic | AT2G07795 | 1.190511 | 0.000163 | Up |
| Abiotic | AT2G07739 | 1.023946 | 0.000803 | Up |
| Abiotic | AT2G07662 | 1.090324 | 0.000507 | Up |
| Abiotic | AT2G07835 | 1.245422 | 0.00012  | Up |
| Abiotic | AT2G13960 | 1.234176 | 3.36E-07 | Up |
| Abiotic | AT2G15790 | 1.058001 | 2.37E-06 | Up |
| Abiotic | AT2G16586 | 1.356491 | 1.89E-06 | Up |
| Abiotic | AT2G17660 | 1.44568  | 3.12E-06 | Up |
| Abiotic | AT2G18680 | 1.208105 | 7.90E-07 | Up |
| Abiotic | AT2G19900 | 1.040561 | 0.000752 | Up |
| Abiotic | AT2G20560 | 1.039381 | 9.59E-05 | Up |
| Abiotic | AT2G20825 | 1.046532 | 0.000788 | Up |
| Abiotic | AT2G20880 | 1.454053 | 6.55E-06 | Up |
| Abiotic | AT2G21130 | 1.58525  | 1.51E-09 | Up |
| Abiotic | AT2G21640 | 1.325919 | 1.64E-08 | Up |
| Abiotic | AT2G21660 | 1.215408 | 1.53E-05 | Up |
| Abiotic | AT2G21780 | 1.304874 | 1.03E-05 | Up |
| Abiotic | AT2G21940 | 1.010405 | 1.54E-07 | Up |
| Abiotic | AT2G22470 | 1.367472 | 1.51E-05 | Up |
| Abiotic | AT2G24940 | 1.136954 | 2.86E-06 | Up |
| Abiotic | AT2G25140 | 1.20775  | 2.79E-07 | Up |
| Abiotic | AT2G25460 | 1.62     | 1.06E-08 | Up |
| Abiotic | AT2G26150 | 1.211499 | 1.91E-05 | Up |
| Abiotic | AT2G27280 | 1.003248 | 0.001086 | Up |
| Abiotic | AT2G28400 | 1.435944 | 7.82E-08 | Up |
| Abiotic | AT2G28900 | 1.526893 | 4.33E-08 | Up |
| Abiotic | AT2G29450 | 1.421997 | 1.04E-08 | Up |
| Abiotic | AT2G29500 | 2.866581 | 1.44E-16 | Up |
| Abiotic | AT2G30830 | 1.191221 | 2.76E-05 | Up |
| Abiotic | AT2G31590 | 1.34123  | 1.62E-05 | Up |
| Abiotic | AT2G31910 | 1.076823 | 8.16E-05 | Up |
| Abiotic | AT2G32120 | 1.168086 | 1.42E-06 | Up |
| Abiotic | AT2G32140 | 1.282923 | 7.13E-05 | Up |
| Abiotic | AT2G32190 | 1.18132  | 7.74E-05 | Up |
| Abiotic | AT2G32210 | 1.236878 | 1.52E-05 | Up |
| Abiotic | AT2G33380 | 1.83829  | 2.25E-09 | Up |
| Abiotic | AT2G33580 | 1.117651 | 3.81E-07 | Up |
| Abiotic | AT2G33590 | 1.726104 | 1.84E-10 | Up |
| Abiotic | AT2G34810 | 1.262748 | 6.51E-06 | Up |
| Abiotic | AT2G36220 | 1.631661 | 4.41E-07 | Up |
| Abiotic | AT2G36460 | 1.507786 | 2.93E-09 | Up |
| Abiotic | AT2G36780 | 1.123355 | 0.000377 | Up |
| Abiotic | AT2G37180 | 1.33863  | 2.44E-08 | Up |
| Abiotic | AT2G37870 | 1.142629 | 0.000328 | Up |
| Abiotic | AT2G38255 | 1.256957 | 7.38E-05 | Up |
| Abiotic | AT2G38340 | 2.076644 | 2.02E-11 | Up |
| Abiotic | AT2G38465 | 1.017406 | 0.000444 | Up |
| Abiotic | AT2G39050 | 1.248362 | 3.54E-07 | Up |
| Abiotic | AT2G39420 | 1.036886 | 9.81E-05 | Up |
| Abiotic | AT2G39800 | 1.006321 | 2.40E-05 | Up |

---

---

|         |           |          |          |    |
|---------|-----------|----------|----------|----|
| Abiotic | AT2G40340 | 1.976764 | 3.16E-09 | Up |
| Abiotic | AT2G41190 | 1.213712 | 1.88E-06 | Up |
| Abiotic | AT2G42530 | 1.938671 | 3.37E-09 | Up |
| Abiotic | AT2G42540 | 2.36602  | 8.31E-12 | Up |
| Abiotic | AT2G43020 | 1.03706  | 1.48E-06 | Up |
| Abiotic | AT2G44578 | 1.276639 | 7.40E-05 | Up |
| Abiotic | AT2G45350 | 1.455711 | 1.81E-07 | Up |
| Abiotic | AT2G45760 | 1.243727 | 0.000122 | Up |
| Abiotic | AT2G45840 | 1.064179 | 0.000482 | Up |
| Abiotic | AT2G45940 | 1.156443 | 0.000164 | Up |
| Abiotic | AT2G47180 | 1.561526 | 6.94E-07 | Up |
| Abiotic | AT2G47520 | 1.15966  | 0.000116 | Up |
| Abiotic | AT2G47780 | 1.214353 | 2.96E-07 | Up |
| Abiotic | AT3G03260 | 1.35195  | 3.45E-05 | Up |
| Abiotic | AT3G03270 | 1.028025 | 0.000186 | Up |
| Abiotic | AT3G03341 | 1.763994 | 2.27E-07 | Up |
| Abiotic | AT3G04050 | 1.0978   | 4.98E-05 | Up |
| Abiotic | AT3G04710 | 1.436176 | 1.70E-08 | Up |
| Abiotic | AT3G05640 | 1.454533 | 1.23E-08 | Up |
| Abiotic | AT3G05650 | 1.298449 | 6.21E-06 | Up |
| Abiotic | AT3G05880 | 1.068198 | 4.07E-05 | Up |
| Abiotic | AT3G08690 | 1.218521 | 1.28E-07 | Up |
| Abiotic | AT3G08700 | 1.368582 | 3.27E-05 | Up |
| Abiotic | AT3G08970 | 1.036071 | 2.33E-05 | Up |
| Abiotic | AT3G09390 | 1.156031 | 2.63E-05 | Up |
| Abiotic | AT3G09640 | 1.256009 | 6.24E-05 | Up |
| Abiotic | AT3G10560 | 1.915734 | 1.18E-08 | Up |
| Abiotic | AT3G11020 | 2.180431 | 1.97E-11 | Up |
| Abiotic | AT3G11410 | 1.18004  | 1.56E-08 | Up |
| Abiotic | AT3G11580 | 1.325064 | 5.56E-07 | Up |
| Abiotic | AT3G12580 | 1.265289 | 5.32E-05 | Up |
| Abiotic | AT3G13130 | 1.179491 | 0.000221 | Up |
| Abiotic | AT3G14200 | 1.42266  | 1.05E-08 | Up |
| Abiotic | AT3G14440 | 1.502983 | 1.55E-06 | Up |
| Abiotic | AT3G15740 | 1.015683 | 0.000213 | Up |
| Abiotic | AT3G18360 | 1.043332 | 0.00018  | Up |
| Abiotic | AT3G18810 | 1.137764 | 0.000222 | Up |
| Abiotic | AT3G19270 | 1.062892 | 4.07E-05 | Up |
| Abiotic | AT3G19580 | 1.115462 | 5.56E-05 | Up |
| Abiotic | AT3G19920 | 1.39231  | 2.48E-05 | Up |
| Abiotic | AT3G21660 | 1.147564 | 0.000103 | Up |
| Abiotic | AT3G21890 | 1.355928 | 1.45E-05 | Up |
| Abiotic | AT3G22090 | 1.627667 | 4.66E-07 | Up |
| Abiotic | AT3G22100 | 1.947906 | 2.36E-09 | Up |
| Abiotic | AT3G22275 | 1.218637 | 0.000153 | Up |
| Abiotic | AT3G22840 | 1.256384 | 4.40E-05 | Up |
| Abiotic | AT3G25230 | 1.322285 | 1.80E-08 | Up |
| Abiotic | AT3G25240 | 1.098677 | 0.000408 | Up |
| Abiotic | AT3G28210 | 1.160312 | 0.000125 | Up |
| Abiotic | AT3G29575 | 1.006736 | 5.33E-05 | Up |
| Abiotic | AT3G41762 | 1.520019 | 3.01E-06 | Up |

---

---

|         |           |          |          |    |
|---------|-----------|----------|----------|----|
| Abiotic | AT3G44260 | 1.633625 | 8.79E-08 | Up |
| Abiotic | AT3G45940 | 1.677682 | 3.14E-07 | Up |
| Abiotic | AT3G46640 | 1.076603 | 1.21E-05 | Up |
| Abiotic | AT3G48240 | 1.232348 | 1.29E-05 | Up |
| Abiotic | AT3G48520 | 1.197029 | 0.000145 | Up |
| Abiotic | AT3G48835 | 1.322857 | 4.66E-06 | Up |
| Abiotic | AT3G50940 | 1.085608 | 0.000395 | Up |
| Abiotic | AT3G53230 | 1.906835 | 2.25E-10 | Up |
| Abiotic | AT3G53990 | 1.517361 | 7.54E-08 | Up |
| Abiotic | AT3G54950 | 1.103095 | 2.47E-06 | Up |
| Abiotic | AT3G55970 | 1.221835 | 0.000142 | Up |
| Abiotic | AT3G55980 | 1.10044  | 2.34E-06 | Up |
| Abiotic | AT3G56250 | 1.079927 | 9.09E-06 | Up |
| Abiotic | AT3G56790 | 1.619626 | 1.01E-06 | Up |
| Abiotic | AT3G59730 | 1.181714 | 7.32E-05 | Up |
| Abiotic | AT3G62260 | 1.585979 | 1.14E-09 | Up |
| Abiotic | AT3G63060 | 1.244757 | 4.23E-08 | Up |
| Abiotic | AT4G00940 | 1.274839 | 1.24E-06 | Up |
| Abiotic | AT4G01360 | 1.131028 | 0.000214 | Up |
| Abiotic | AT4G01435 | 1.379709 | 1.81E-05 | Up |
| Abiotic | AT4G01550 | 1.129503 | 2.14E-07 | Up |
| Abiotic | AT4G02005 | 1.371486 | 1.04E-08 | Up |
| Abiotic | AT4G02650 | 1.043338 | 0.000811 | Up |
| Abiotic | AT4G02690 | 1.163975 | 0.000269 | Up |
| Abiotic | AT4G03320 | 1.355805 | 1.01E-06 | Up |
| Abiotic | AT4G03430 | 1.274488 | 3.24E-10 | Up |
| Abiotic | AT4G03930 | 1.124812 | 5.85E-05 | Up |
| Abiotic | AT4G04020 | 2.03889  | 2.62E-11 | Up |
| Abiotic | AT4G09020 | 1.326822 | 2.85E-07 | Up |
| Abiotic | AT4G09130 | 1.178561 | 0.000212 | Up |
| Abiotic | AT4G10843 | 1.107389 | 5.96E-06 | Up |
| Abiotic | AT4G11660 | 1.131455 | 2.38E-07 | Up |
| Abiotic | AT4G12290 | 1.157924 | 2.21E-05 | Up |
| Abiotic | AT4G12400 | 1.241998 | 7.60E-06 | Up |
| Abiotic | AT4G13395 | 1.461733 | 7.52E-06 | Up |
| Abiotic | AT4G13800 | 1.139701 | 2.79E-05 | Up |
| Abiotic | AT4G15120 | 1.044451 | 0.000123 | Up |
| Abiotic | AT4G16500 | 1.067233 | 1.37E-06 | Up |
| Abiotic | AT4G17230 | 1.044486 | 1.92E-06 | Up |
| Abiotic | AT4G17470 | 1.501299 | 1.03E-06 | Up |
| Abiotic | AT4G18280 | 1.697466 | 4.54E-09 | Up |
| Abiotic | AT4G18980 | 1.187545 | 0.000173 | Up |
| Abiotic | AT4G19230 | 1.376727 | 4.65E-07 | Up |
| Abiotic | AT4G19430 | 1.962186 | 5.90E-09 | Up |
| Abiotic | AT4G21320 | 1.145832 | 8.46E-06 | Up |
| Abiotic | AT4G21440 | 1.259779 | 5.10E-05 | Up |
| Abiotic | AT4G21680 | 1.364937 | 2.41E-05 | Up |
| Abiotic | AT4G23600 | 1.134361 | 0.000132 | Up |
| Abiotic | AT4G24380 | 1.034066 | 2.30E-06 | Up |
| Abiotic | AT4G24410 | 1.049819 | 0.00021  | Up |
| Abiotic | AT4G24413 | 1.985235 | 8.98E-09 | Up |

---

|         |           |          |          |    |
|---------|-----------|----------|----------|----|
| Abiotic | AT4G24570 | 1.928306 | 7.15E-12 | Up |
| Abiotic | AT4G25000 | 1.386716 | 2.05E-05 | Up |
| Abiotic | AT4G25340 | 1.074699 | 1.35E-05 | Up |
| Abiotic | AT4G25380 | 1.206477 | 0.000147 | Up |
| Abiotic | AT4G25433 | 1.217341 | 0.000118 | Up |
| Abiotic | AT4G25480 | 1.395791 | 9.24E-06 | Up |
| Abiotic | AT4G25490 | 1.107888 | 0.000439 | Up |
| Abiotic | AT4G25810 | 1.020668 | 0.000155 | Up |
| Abiotic | AT4G26080 | 1.127214 | 8.11E-08 | Up |
| Abiotic | AT4G26270 | 1.908057 | 5.96E-11 | Up |
| Abiotic | AT4G26780 | 1.463703 | 5.47E-08 | Up |
| Abiotic | AT4G27410 | 1.567787 | 1.83E-07 | Up |
| Abiotic | AT4G27654 | 1.36337  | 3.07E-05 | Up |
| Abiotic | AT4G28140 | 1.723826 | 1.79E-07 | Up |
| Abiotic | AT4G28390 | 1.437726 | 8.65E-07 | Up |
| Abiotic | AT4G29770 | 2.031179 | 1.24E-09 | Up |
| Abiotic | AT4G29780 | 1.352816 | 1.58E-07 | Up |
| Abiotic | AT4G31351 | 1.289076 | 2.88E-05 | Up |
| Abiotic | AT4G31354 | 1.769308 | 1.24E-08 | Up |
| Abiotic | AT4G31405 | 1.537782 | 2.07E-06 | Up |
| Abiotic | AT4G31408 | 1.207748 | 1.02E-06 | Up |
| Abiotic | AT4G32450 | 1.085198 | 1.60E-06 | Up |
| Abiotic | AT4G33467 | 1.136471 | 0.0003   | Up |
| Abiotic | AT4G33905 | 1.972294 | 2.46E-10 | Up |
| Abiotic | AT4G33930 | 1.74381  | 2.58E-07 | Up |
| Abiotic | AT4G33940 | 1.095128 | 8.92E-07 | Up |
| Abiotic | AT4G33985 | 1.489935 | 1.81E-08 | Up |
| Abiotic | AT4G34850 | 1.075841 | 7.67E-05 | Up |
| Abiotic | AT4G35690 | 1.113521 | 0.000431 | Up |
| Abiotic | AT4G35985 | 1.55564  | 5.02E-08 | Up |
| Abiotic | AT4G36010 | 1.792834 | 2.37E-09 | Up |
| Abiotic | AT4G36490 | 1.530089 | 5.00E-06 | Up |
| Abiotic | AT4G36795 | 1.062137 | 0.000618 | Up |
| Abiotic | AT4G36950 | 1.262703 | 9.84E-05 | Up |
| Abiotic | AT4G36990 | 1.972688 | 4.52E-10 | Up |
| Abiotic | AT4G39110 | 1.747989 | 5.54E-10 | Up |
| Abiotic | AT4G39210 | 1.414439 | 3.91E-08 | Up |
| Abiotic | AT4G39360 | 1.21101  | 0.000133 | Up |
| Abiotic | AT5G01520 | 1.388574 | 5.18E-07 | Up |
| Abiotic | AT5G01990 | 1.528958 | 1.36E-11 | Up |
| Abiotic | AT5G02020 | 1.181495 | 7.28E-05 | Up |
| Abiotic | AT5G03020 | 1.098189 | 0.000162 | Up |
| Abiotic | AT5G03204 | 1.435903 | 8.54E-06 | Up |
| Abiotic | AT5G03210 | 1.816079 | 7.72E-08 | Up |
| Abiotic | AT5G03435 | 1.078795 | 0.000352 | Up |
| Abiotic | AT5G03720 | 1.50087  | 2.12E-08 | Up |
| Abiotic | AT5G04250 | 1.1913   | 2.06E-09 | Up |
| Abiotic | AT5G04340 | 1.706695 | 2.69E-07 | Up |
| Abiotic | AT5G05220 | 2.015258 | 4.76E-09 | Up |
| Abiotic | AT5G05410 | 3.103058 | 5.40E-19 | Up |
| Abiotic | AT5G05490 | 1.17667  | 1.67E-05 | Up |

---

|         |           |          |          |    |
|---------|-----------|----------|----------|----|
| Abiotic | AT5G10340 | 1.6157   | 1.00E-06 | Up |
| Abiotic | AT5G11680 | 1.520538 | 3.64E-09 | Up |
| Abiotic | AT5G12020 | 1.005464 | 0.000921 | Up |
| Abiotic | AT5G12110 | 1.399979 | 1.75E-07 | Up |
| Abiotic | AT5G13200 | 1.330518 | 7.67E-06 | Up |
| Abiotic | AT5G13220 | 1.015283 | 1.71E-06 | Up |
| Abiotic | AT5G15450 | 1.57187  | 8.67E-10 | Up |
| Abiotic | AT5G15537 | 1.121426 | 1.94E-06 | Up |
| Abiotic | AT5G15960 | 1.514799 | 5.91E-06 | Up |
| Abiotic | AT5G15970 | 1.778547 | 8.49E-09 | Up |
| Abiotic | AT5G16380 | 1.09786  | 4.44E-07 | Up |
| Abiotic | AT5G17460 | 1.737152 | 1.02E-09 | Up |
| Abiotic | AT5G17760 | 1.130294 | 5.97E-06 | Up |
| Abiotic | AT5G17850 | 1.016405 | 6.04E-07 | Up |
| Abiotic | AT5G19720 | 1.053157 | 0.000742 | Up |
| Abiotic | AT5G19875 | 1.084078 | 4.49E-05 | Up |
| Abiotic | AT5G22290 | 1.136559 | 4.10E-07 | Up |
| Abiotic | AT5G24600 | 1.12379  | 0.00034  | Up |
| Abiotic | AT5G25110 | 1.15151  | 6.83E-05 | Up |
| Abiotic | AT5G25280 | 1.847772 | 8.21E-10 | Up |
| Abiotic | AT5G25390 | 1.320386 | 2.46E-05 | Up |
| Abiotic | AT5G25450 | 1.494968 | 2.73E-06 | Up |
| Abiotic | AT5G25755 | 1.643518 | 6.08E-09 | Up |
| Abiotic | AT5G25756 | 1.304071 | 2.34E-05 | Up |
| Abiotic | AT5G04065 | 1.532921 | 4.07E-06 | Up |
| Abiotic | AT5G27280 | 1.032764 | 3.73E-06 | Up |
| Abiotic | AT5G28237 | 1.526409 | 5.24E-06 | Up |
| Abiotic | AT5G37340 | 1.116935 | 5.80E-08 | Up |
| Abiotic | AT5G37440 | 1.384356 | 3.16E-08 | Up |
| Abiotic | AT5G37750 | 1.339777 | 3.29E-06 | Up |
| Abiotic | AT5G05545 | 1.083192 | 6.69E-05 | Up |
| Abiotic | AT5G37940 | 1.146765 | 0.000289 | Up |
| Abiotic | AT5G38130 | 1.341605 | 1.73E-05 | Up |
| Abiotic | AT5G38895 | 1.114225 | 1.67E-05 | Up |
| Abiotic | AT5G40382 | 1.221298 | 0.000145 | Up |
| Abiotic | AT5G40790 | 1.074057 | 0.000546 | Up |
| Abiotic | AT5G42380 | 1.027083 | 0.000875 | Up |
| Abiotic | AT5G42900 | 1.107347 | 0.000426 | Up |
| Abiotic | AT5G43300 | 1.117619 | 0.000218 | Up |
| Abiotic | AT5G43440 | 1.178819 | 4.42E-05 | Up |
| Abiotic | AT5G43620 | 2.073894 | 2.62E-13 | Up |
| Abiotic | AT5G43950 | 1.213208 | 1.15E-09 | Up |
| Abiotic | AT5G44005 | 1.622541 | 4.27E-09 | Up |
| Abiotic | AT5G45630 | 1.959202 | 1.35E-08 | Up |
| Abiotic | AT5G46040 | 1.110766 | 0.000427 | Up |
| Abiotic | AT5G48570 | 2.277575 | 2.01E-13 | Up |
| Abiotic | AT5G49200 | 1.376008 | 3.01E-05 | Up |
| Abiotic | AT5G49920 | 1.071702 | 0.000297 | Up |
| Abiotic | AT5G50800 | 1.098711 | 0.000391 | Up |
| Abiotic | AT5G51440 | 1.514646 | 2.37E-07 | Up |
| Abiotic | AT5G51990 | 1.056197 | 0.000647 | Up |

---

---

|         |           |          |          |    |
|---------|-----------|----------|----------|----|
| Abiotic | AT5G52300 | 1.052717 | 0.000746 | Up |
| Abiotic | AT5G52310 | 2.009743 | 2.56E-10 | Up |
| Abiotic | AT5G52630 | 1.273237 | 2.45E-08 | Up |
| Abiotic | AT5G52640 | 1.889731 | 2.59E-09 | Up |
| Abiotic | AT5G53710 | 1.008682 | 0.000996 | Up |
| Abiotic | AT5G53740 | 1.18583  | 0.000218 | Up |
| Abiotic | AT5G53870 | 1.000996 | 0.000107 | Up |
| Abiotic | AT5G54165 | 1.240637 | 0.000117 | Up |
| Abiotic | AT5G54940 | 1.213682 | 4.93E-06 | Up |
| Abiotic | AT5G55050 | 1.066436 | 0.000297 | Up |
| Abiotic | AT5G56010 | 1.07004  | 1.35E-05 | Up |
| Abiotic | AT5G56600 | 1.148713 | 9.49E-08 | Up |
| Abiotic | AT5G57050 | 1.221872 | 1.50E-09 | Up |
| Abiotic | AT5G57150 | 1.007172 | 2.45E-07 | Up |
| Abiotic | AT5G57510 | 1.186421 | 0.000216 | Up |
| Abiotic | AT5G57560 | 1.375362 | 1.93E-07 | Up |
| Abiotic | AT5G58787 | 1.108309 | 2.01E-06 | Up |
| Abiotic | AT5G59220 | 1.279098 | 1.96E-05 | Up |
| Abiotic | AT5G59310 | 1.437859 | 1.37E-05 | Up |
| Abiotic | AT5G59320 | 1.31432  | 5.73E-05 | Up |
| Abiotic | AT5G59720 | 3.289387 | 1.64E-20 | Up |
| Abiotic | AT5G59820 | 1.959792 | 1.02E-08 | Up |
| Abiotic | AT5G60320 | 1.150295 | 0.000248 | Up |
| Abiotic | AT5G61890 | 1.07724  | 0.000225 | Up |
| Abiotic | AT5G62040 | 1.277856 | 6.32E-05 | Up |
| Abiotic | AT5G62520 | 2.843117 | 1.50E-16 | Up |
| Abiotic | AT5G63130 | 2.098882 | 6.93E-13 | Up |
| Abiotic | AT5G64230 | 1.232633 | 2.56E-06 | Up |
| Abiotic | AT5G64510 | 2.71291  | 2.03E-15 | Up |
| Abiotic | AT5G64750 | 1.047183 | 0.000364 | Up |
| Abiotic | AT5G64870 | 1.447589 | 2.29E-08 | Up |
| Abiotic | AT5G65300 | 1.593605 | 1.92E-08 | Up |
| Abiotic | AT5G66110 | 1.178404 | 8.14E-05 | Up |
| Abiotic | AT5G66400 | 1.137459 | 0.000345 | Up |
| Abiotic | AT5G66880 | 1.173685 | 2.08E-07 | Up |
| Abiotic | AT5G67290 | 1.076177 | 9.82E-07 | Up |
| Abiotic | AT5G67310 | 1.409404 | 1.62E-05 | Up |
| Abiotic | AT5G67480 | 1.434107 | 4.50E-07 | Up |
| Abiotic | ATMG00040 | 1.233791 | 0.00013  | Up |
| Abiotic | ATMG00060 | 2.438736 | 7.89E-13 | Up |
| Abiotic | ATMG00070 | 1.461416 | 3.42E-06 | Up |
| Abiotic | ATMG00080 | 1.345877 | 2.39E-05 | Up |
| Abiotic | ATMG00090 | 1.122366 | 0.000262 | Up |
| Abiotic | ATMG00110 | 1.54814  | 9.74E-07 | Up |
| Abiotic | ATMG00160 | 2.138813 | 8.64E-11 | Up |
| Abiotic | ATMG00270 | 2.108584 | 1.06E-09 | Up |
| Abiotic | ATMG00285 | 1.908618 | 1.60E-08 | Up |
| Abiotic | ATMG00300 | 1.355056 | 3.30E-05 | Up |
| Abiotic | ATMG00400 | 1.034836 | 0.000805 | Up |
| Abiotic | ATMG00410 | 1.13493  | 0.000339 | Up |
| Abiotic | ATMG00450 | 1.189067 | 0.000142 | Up |

---

|         |           |          |          |      |
|---------|-----------|----------|----------|------|
| Abiotic | ATMG00510 | 2.048819 | 1.50E-10 | Up   |
| Abiotic | ATMG00513 | 1.853702 | 1.89E-08 | Up   |
| Abiotic | ATMG00516 | 1.646964 | 7.81E-07 | Up   |
| Abiotic | ATMG00560 | 1.600818 | 1.76E-06 | Up   |
| Abiotic | ATMG00630 | 1.231342 | 8.13E-05 | Up   |
| Abiotic | ATMG00640 | 1.726131 | 7.90E-08 | Up   |
| Abiotic | ATMG00650 | 2.061594 | 2.61E-09 | Up   |
| Abiotic | ATMG00660 | 1.331537 | 2.06E-05 | Up   |
| Abiotic | ATMG00670 | 1.32236  | 2.66E-05 | Up   |
| Abiotic | ATMG00690 | 1.901881 | 2.19E-08 | Up   |
| Abiotic | ATMG00730 | 2.050272 | 2.89E-09 | Up   |
| Abiotic | ATMG00810 | 1.364922 | 3.26E-05 | Up   |
| Abiotic | ATMG00940 | 1.053647 | 0.000543 | Up   |
| Abiotic | ATMG00960 | 1.462321 | 9.98E-06 | Up   |
| Abiotic | ATMG01000 | 1.240501 | 0.000127 | Up   |
| Abiotic | ATMG01090 | 1.412848 | 1.22E-05 | Up   |
| Abiotic | ATMG01120 | 1.769154 | 1.43E-07 | Up   |
| Abiotic | ATMG01130 | 1.905809 | 1.57E-08 | Up   |
| Abiotic | ATMG01170 | 1.573476 | 8.67E-07 | Up   |
| Abiotic | ATMG01200 | 1.469969 | 7.66E-06 | Up   |
| Abiotic | ATMG01220 | 1.018357 | 0.000994 | Up   |
| Abiotic | ATMG01360 | 1.861423 | 3.73E-08 | Up   |
| Abiotic | AT1G11740 | -1.04173 | 1.37E-05 | Down |
| Abiotic | AT1G12070 | -1.32533 | 7.48E-07 | Down |
| Abiotic | AT1G12805 | -1.02017 | 0.000946 | Down |
| Abiotic | AT1G27020 | -1.62365 | 1.18E-06 | Down |
| Abiotic | AT1G54740 | -1.16015 | 0.000112 | Down |
| Abiotic | AT1G65390 | -1.01725 | 0.000474 | Down |
| Abiotic | AT1G66465 | -1.13657 | 0.00033  | Down |
| Abiotic | AT1G68720 | -1.04295 | 3.97E-07 | Down |
| Abiotic | AT2G17850 | -1.00697 | 0.000813 | Down |
| Abiotic | AT2G21650 | -1.01887 | 0.000101 | Down |
| Abiotic | AT2G27380 | -1.23377 | 0.000136 | Down |
| Abiotic | AT2G28180 | -1.11248 | 0.000407 | Down |
| Abiotic | AT2G30230 | -1.21109 | 3.18E-06 | Down |
| Abiotic | AT2G30670 | -1.20016 | 0.00017  | Down |
| Abiotic | AT2G39570 | -1.41109 | 4.41E-08 | Down |
| Abiotic | AT2G39820 | -1.01043 | 0.000678 | Down |
| Abiotic | AT2G41250 | -1.1101  | 5.42E-06 | Down |
| Abiotic | AT3G01970 | -1.15556 | 3.82E-05 | Down |
| Abiotic | AT3G05150 | -1.26648 | 6.80E-06 | Down |
| Abiotic | AT3G11920 | -1.24199 | 0.000121 | Down |
| Abiotic | AT3G15356 | -1.01925 | 0.000187 | Down |
| Abiotic | AT3G15620 | -1.0347  | 8.26E-07 | Down |
| Abiotic | AT3G21351 | -1.08922 | 5.23E-06 | Down |
| Abiotic | AT3G21530 | -1.05696 | 1.51E-05 | Down |
| Abiotic | AT3G23550 | -1.08302 | 0.000291 | Down |
| Abiotic | AT3G27785 | -1.2688  | 4.84E-05 | Down |
| Abiotic | AT3G28170 | -1.09789 | 0.000351 | Down |
| Abiotic | AT3G51910 | -1.14832 | 0.000156 | Down |
| Abiotic | AT3G52510 | -1.11043 | 0.00042  | Down |

|         |           |          |          |      |
|---------|-----------|----------|----------|------|
| Abiotic | AT3G54510 | -1.63031 | 4.00E-07 | Down |
| Abiotic | AT3G61198 | -1.07293 | 5.07E-05 | Down |
| Abiotic | AT4G11210 | -1.09757 | 0.000284 | Down |
| Abiotic | AT4G11460 | -1.40491 | 3.18E-06 | Down |
| Abiotic | AT4G14130 | -1.31794 | 4.96E-07 | Down |
| Abiotic | AT4G15680 | -1.28703 | 2.69E-05 | Down |
| Abiotic | AT4G16350 | -1.04203 | 1.21E-05 | Down |
| Abiotic | AT4G20450 | -1.05845 | 0.000279 | Down |
| Abiotic | AT4G25750 | -1.01435 | 3.78E-05 | Down |
| Abiotic | AT5G04190 | -1.42268 | 2.71E-07 | Down |
| Abiotic | AT5G10100 | -1.3906  | 6.27E-06 | Down |
| Abiotic | AT5G14000 | -1.00087 | 0.000261 | Down |
| Abiotic | AT5G14400 | -1.2268  | 0.000132 | Down |
| Abiotic | AT5G39660 | -1.01027 | 2.15E-05 | Down |
| Abiotic | AT5G53160 | -1.05387 | 3.91E-07 | Down |
| Abiotic | AT5G53980 | -1.72352 | 3.65E-08 | Down |
| Abiotic | AT5G55270 | -1.03197 | 0.00069  | Down |
| Abiotic | ATCG00120 | -1.11198 | 0.00026  | Down |
| Abiotic | ATCG00130 | -1.16047 | 9.45E-05 | Down |
| Abiotic | ATCG00150 | -1.1315  | 0.000127 | Down |
| Abiotic | ATCG00160 | -1.1117  | 0.000406 | Down |
| Abiotic | ATCG00170 | -1.14322 | 0.000188 | Down |
| Abiotic | ATCG00180 | -1.13068 | 0.000147 | Down |
| Abiotic | ATCG00340 | -1.13883 | 0.000337 | Down |
| Abiotic | ATCG00350 | -1.15864 | 0.000138 | Down |
| Abiotic | ATCG00360 | -1.16438 | 0.000176 | Down |
| Abiotic | ATCG00530 | -1.52442 | 3.42E-06 | Down |
| Abiotic | ATCG00540 | -1.19412 | 0.000187 | Down |
| Abiotic | ATCG00550 | -1.02316 | 0.000956 | Down |
| Abiotic | ATCG00600 | -1.26264 | 9.34E-05 | Down |
| Abiotic | ATCG00650 | -1.09114 | 0.00053  | Down |
| Abiotic | ATCG00660 | -1.03167 | 0.000576 | Down |
| Abiotic | ATCG00740 | -1.09856 | 0.000479 | Down |
| Abiotic | ATCG00770 | -1.40354 | 7.59E-06 | Down |
| Abiotic | ATCG00780 | -1.14081 | 0.000125 | Down |
| Abiotic | ATCG00800 | -1.64287 | 4.21E-07 | Down |
| Abiotic | ATCG00810 | -1.26368 | 6.99E-05 | Down |
| Abiotic | ATCG01020 | -1.03471 | 0.000856 | Down |
| Abiotic | ATCG01070 | -1.04453 | 0.000767 | Down |
| Abiotic | ATCG01090 | -1.04604 | 0.000791 | Down |
| Abiotic | ATCG01100 | -1.04059 | 0.000545 | Down |
| Abiotic | ATCG01130 | -1.12274 | 0.00036  | Down |

Table S2. Gene ontology enrichment analysis of the DEGs under abiotic and biotic stresses.

| Abiotic            |            |                               |            | Biotic             |            |                            |            |
|--------------------|------------|-------------------------------|------------|--------------------|------------|----------------------------|------------|
| Term_type          | GO number  | Term                          | Query-item | Term_type          | GO number  | Term                       | Query-item |
| Biological process | GO:0044249 | cellular biosynthetic process | 80         | Biological process | GO:0051707 | response to other organism | 32         |

|                    |            |                                                                |     |                    |            |                                                                 |     |
|--------------------|------------|----------------------------------------------------------------|-----|--------------------|------------|-----------------------------------------------------------------|-----|
| Biological process | GO:0009058 | biosynthetic process                                           | 83  | Biological process | GO:0009607 | response to biotic stimulus                                     | 33  |
| Biological process | GO:0009628 | response to abiotic stimulus                                   | 84  | Biological process | GO:0031323 | regulation of cellular metabolic process                        | 33  |
| Biological process | GO:0042221 | response to chemical stimulus                                  | 89  | Biological process | GO:0051704 | multi-organism process                                          | 34  |
| Biological process | GO:0006950 | response to stress                                             | 104 | Biological process | GO:0010033 | response to organic substance                                   | 37  |
| Biological process | GO:0044260 | cellular macromolecule metabolic process                       | 106 | Biological process | GO:0006952 | defense response                                                | 43  |
| Biological process | GO:0043170 | macromolecule metabolic process                                | 111 | Biological process | GO:0042221 | response to chemical stimulus                                   | 58  |
| Biological process | GO:0050896 | response to stimulus                                           | 134 | Biological process | GO:0050794 | regulation of cellular process                                  | 63  |
| Biological process | GO:0044238 | primary metabolic process                                      | 137 | Biological process | GO:0050789 | regulation of biological process                                | 66  |
| Biological process | GO:0044237 | cellular metabolic process                                     | 159 | Biological process | GO:0006950 | response to stress                                              | 72  |
| Biological process | GO:0008152 | metabolic process                                              | 174 | Biological process | GO:0065007 | biological regulation                                           | 77  |
| Biological process | GO:0009987 | cellular process                                               | 190 | Biological process | GO:0050896 | response to stimulus                                            | 116 |
| Molecular function | GO:0015077 | monovalent inorganic cation transmembrane transporter activity | 17  | Molecular function | GO:0017076 | purine nucleotide binding                                       | 30  |
| Molecular function | GO:0022890 | inorganic cation transmembrane transporter activity            | 17  | Molecular function | GO:0016491 | oxidoreductase activity                                         | 34  |
| Molecular function | GO:0008324 | cation transmembrane transporter activity                      | 21  | Molecular function | GO:0043169 | anion binding                                                   | 34  |
| Molecular function | GO:0015075 | ion transmembrane transporter activity                         | 22  | Molecular function | GO:0043167 | ion binding                                                     | 34  |
| Molecular function | GO:0022891 | substrate-specific transmembrane transporter activity          | 28  | Molecular function | GO:0016301 | kinase activity                                                 | 37  |
| Molecular function | GO:0022892 | substrate-specific transporter activity                        | 29  | Molecular function | GO:0016772 | transferase activity, transferring phosphorus-containing groups | 37  |

|                    |            |                                          |     |                    |            |                                  |     |
|--------------------|------------|------------------------------------------|-----|--------------------|------------|----------------------------------|-----|
| Molecular function | GO:0022857 | transmembrane transporter activity       | 31  | Molecular function | GO:0003700 | transcription factor activity    | 37  |
| Molecular function | GO:0005215 | transporter activity                     | 36  | Molecular function | GO:0030528 | transcription regulator activity | 38  |
| Molecular function | GO:0016491 | oxidoreductase activity                  | 42  | Molecular function | GO:0016787 | hydrolase activity               | 52  |
| Molecular function | GO:0003700 | transcription factor activity            | 52  | Molecular function | GO:0016740 | transferase activity             | 70  |
| Molecular function | GO:0030528 | transcription regulator activity         | 54  | Molecular function | GO:0005488 | binding                          | 163 |
| Molecular function | GO:0003677 | DNA binding                              | 58  | Molecular function | GO:0003824 | catalytic activity               | 168 |
| Cellular component | GO:0032991 | macromolecular complex                   | 55  | Cellular component | GO:0009505 | plant-type cell wall             | 8   |
| Cellular component | GO:0016020 | membrane                                 | 75  | Cellular component | GO:0048046 | apoplast                         | 11  |
| Cellular component | GO:0044444 | cytoplasmic part                         | 115 | Cellular component | GO:0030312 | external encapsulating structure | 16  |
| Cellular component | GO:0005737 | cytoplasm                                | 128 | Cellular component | GO:0005618 | cell wall                        | 16  |
| Cellular component | GO:0043231 | intracellular membrane-bounded organelle | 141 | Cellular component | GO:0005576 | extracellular region             | 17  |
| Cellular component | GO:0043227 | membrane-bounded organelle               | 141 | Cellular component | GO:0031224 | intrinsic to membrane            | 19  |
| Cellular component | GO:0043229 | intracellular organelle                  | 147 | Cellular component | GO:0044425 | membrane part                    | 24  |
| Cellular component | GO:0043226 | organelle                                | 147 | Cellular component | GO:0005886 | plasma membrane                  | 26  |
| Cellular component | GO:0044424 | intracellular part                       | 169 | Cellular component | GO:0016020 | membrane                         | 63  |
| Cellular component | GO:0005622 | intracellular                            | 173 | Cellular component | GO:0012505 | endomembrane system              | 70  |
| Cellular component | GO:0044464 | cell part                                | 252 | Cellular component | GO:0044464 | cell part                        | 212 |
| Cellular component | GO:0005623 | cell                                     | 252 | Cellular component | GO:0005623 | cell                             | 212 |

Table S3. Identified transcription factors in response to biotic and abiotic stresses.

| Abiotic        |             |              |                        | Biotic      |             |              |                        | TF Family | Abiotic |
|----------------|-------------|--------------|------------------------|-------------|-------------|--------------|------------------------|-----------|---------|
| TF Family Name | TF Locus Id | Protein Name | Gene Name ,<br>Synonym | Family Name | TF Locus Id | Protein Name | Gene Name ,<br>Synonym | AP2-EREBP | 15      |
| AP2-EREBP      | At1g28370   |              | ATERF11 , ERF11        | AP2-EREBP   | At2g38340   |              |                        | bHLH      | 2       |

|              |           |                  |            |           |             |                        |          |   |
|--------------|-----------|------------------|------------|-----------|-------------|------------------------|----------|---|
| AP2-EREBP    | At1g74930 | ORA47            | AP2-EREBP  | At1g21910 |             | C2C2-CO-like           | 1        |   |
| AP2-EREBP    | At2g20880 |                  | bHLH       | At5g56960 | At-bHLH41   | C2C2-Dof               | 2        |   |
| AP2-EREBP    | At2g38340 |                  | C2H2       | At3g46080 |             | C2H2                   | 8        |   |
| AP2-EREBP    | At2g40340 |                  | C2H2       | At3g46090 | ZAT7, ZAT72 | C3H                    | 3        |   |
| AP2-EREBP    | At2g47520 |                  | C2H2       | At3g28210 | PMZ         | CCAAT-HAP2             | 1        |   |
| AP2-EREBP    | At3g11020 | DREB2, DREB2B    | C2H2       | At2g28710 |             | G2-like                | 1        |   |
| AP2-EREBP    | At4g25480 | CBF3, DREB1A     | C3H        | At1g63840 |             | GRAS                   | 1        |   |
| AP2-EREBP    | At4g25490 | CBF1, DREB1B     | CCAAT-HAP3 | At5g47670 | L1L, NF-YB6 | Homeobox               | 2        |   |
| AP2-EREBP    | At4g28140 |                  | HSF        | At4g36990 | HSF         | 5                      |          |   |
| AP2-EREBP    | At5g05410 | DREB2, DREB2A    | MYB        | At1g74080 | AtMYB122    | ATMYB122, MYB122       | MYB      | 2 |
| AP2-EREBP    | At5g25390 | SHINE2, SHN2     | MYB        | At1g57560 | AtMYB50     | AtMYB50                | NAC      | 6 |
| AP2-EREBP    | At5g51990 | CBF4, DREB1D     | MYB        | At2g32460 | AtMYB101    | ATM1, ATMYB101, MYB101 | RAV      | 1 |
| AP2-EREBP    | At5g61890 |                  | NAC        | At3g44350 |             | anac061                | REM      |   |
| AP2-EREBP    | At5g64750 | ABR1             | NAC        | At1g34180 |             | anac016                | Trihelix |   |
| bHLH         | At3g22100 | At-bHLH117       | NAC        | At2g43000 |             | anac042                | WRKY     | 1 |
| bHLH         | At5g57150 | At-bHLH35        | NAC        | At5g22380 |             | anac090                |          |   |
| C2C2-CO-like | At3g21890 |                  | NAC        | At1g02220 |             | ANAC003                |          |   |
| C2C2-Dof     | At4g00940 |                  | NAC        | At5g18270 |             | ANAC087                |          |   |
| C2C2-Dof     | At5g39660 | CDF2             | REM        | At3g46770 |             | REM22                  |          |   |
| C2H2         | At1g27730 | STZ, ZAT10       | Trihelix   | At2g38250 |             |                        |          |   |
| C2H2         | At1g66500 |                  | WRKY       | At4g11070 | At-WRKY41   | AtWRKY41, WRKY41       |          |   |
| C2H2         | At3g19580 | AZF2             | WRKY       | At2g21900 | At-WRKY59   | AtWRKY59, WRKY59       |          |   |
| C2H2         | At3g28210 | PMZ              | WRKY       | At1g66600 | At-WRKY63   | AtWRKY63, WRKY63       |          |   |
| C2H2         | At5g04340 | C2H2, CZF2, ZAT6 | WRKY       | At5g64810 | At-WRKY51   | atwrky51, WRKY51       |          |   |

|            |           |                   |                  |           |           |                  |
|------------|-----------|-------------------|------------------|-----------|-----------|------------------|
| C2H2       | At5g43620 |                   | WRKY             | At5g13080 | At-WRKY75 | AtWRKY75, WRKY75 |
| C2H2       | At5g59820 | RHL41, ZAT12      | WRKY             | At4g22070 | At-WRKY31 | AtWRKY31, WRKY31 |
| C2H2       | At3g05150 |                   | WRKY             | At1g68150 | At-WRKY9  | AtWRKY9, WRKY9   |
| C3H        | At3g15740 |                   | WRKY             | At5g15130 | At-WRKY72 | AtWRKY72, WRKY72 |
| C3H        | At4g33940 |                   | WRKY             | At2g40740 | At-WRKY55 | AtWRKY55, WRKY55 |
| C3H        | At5g38895 |                   | WRKY             | At2g46400 | At-WRKY46 | AtWRKY46, WRKY46 |
| CCAAT-HAP2 | At1g54160 | NF-YA5, NFYA5     | WRKY             | At5g24110 | At-WRKY30 | AtWRKY30, WRKY30 |
| G2-like    | At3g46640 | LUX, PCL1         | WRKY             | At4g01720 | At-WRKY47 | AtWRKY47, WRKY47 |
| GRAS       | At4g17230 | SCL13             | WRKY             | At5g26170 | At-WRKY50 | AtWRKY50, WRKY50 |
| Homeobox   | At3g03260 | HDG8              | WRKY             | At5g01900 | At-WRKY62 | AtWRKY62, WRKY62 |
| Homeobox   | At5g53980 | ATHB52            | WRKY             | At3g01970 | At-WRKY45 | AtWRKY45, WRKY45 |
| HSF        | At2g26150 | ATHSFA2, HSFA2    |                  |           |           |                  |
| HSF        | At4g11660 |                   |                  |           |           |                  |
| HSF        | At4g36990 |                   |                  |           |           |                  |
| HSF        | At5g03720 | AT-HSFA3, HSFA3   |                  |           |           |                  |
| HSF        | At3g51910 | AT-HSFA7A, HSFA7A |                  |           |           |                  |
| MYB        | At1g56650 | AtMYB75           |                  |           |           |                  |
| MYB        | At4g21440 | AtMYB102          | ATM4, ATM4, ATM4 |           |           |                  |
| NAC        | At1g01720 | ANAC002, ATAF1    |                  |           |           |                  |

|      |           |                                           |
|------|-----------|-------------------------------------------|
| NAC  | At1g32870 | ANAC01<br>3,<br>ANAC13                    |
| NAC  | At1g52890 | ANAC01<br>9                               |
| NAC  | At1g69490 | ANAC02<br>9,<br>ATNAP,<br>NAP             |
| NAC  | At4g27410 | ANAC07<br>2, RD26                         |
| NAC  | At5g22290 | anac089                                   |
| RAV  | At3g11580 |                                           |
| WRKY | At3g01970 | At-<br>WRKY45<br>At-<br>WRKY45,<br>WRKY45 |

**Table S4.** miRNAs associated with the DEGs were discovered using the computational algorithm psRNATarget server.

| Abiotic     |   | Biotic      |
|-------------|---|-------------|
| miRNA       |   | miRNA_Acc.  |
| ath-miR858  | 8 | ath-miR172  |
| ath-miR5665 | 6 | ath-miR414  |
| ath-miR5658 | 4 | ath-miR5021 |
| ath-miR395  | 3 | ath-miR5633 |
| ath-miR162  | 2 | ath-miR5658 |
| ath-miR413  | 2 |             |
| ath-miR5648 | 2 |             |
| ath-miR838  | 2 |             |
| ath-miR161  | 1 |             |
| ath-miR3440 | 1 |             |
| ath-miR398  | 1 |             |
| ath-miR400  | 1 |             |
| ath-miR407  | 1 |             |
| ath-miR414  | 1 |             |
| ath-miR4221 | 1 |             |
| ath-miR447  | 1 |             |
| ath-miR5023 | 1 |             |
| ath-miR5640 | 1 |             |
| ath-miR5653 | 1 |             |
| ath-miR5654 | 1 |             |
| ath-miR5657 | 1 |             |
| ath-miR777  | 1 |             |
| ath-miR8166 | 1 |             |
| ath-miR847  | 1 |             |
| ath-miR865  | 1 |             |
